# Supplementary material for: In situ assembly of well-dispersed Ni nanoparticles on silica nanotubes and excellent catalytic activity in 4-nitrophenol reduction
Source: Royal Society of Chemistry journal article supplement (doi:10.1039/c4nr02096k), 2014-01-01
Supplement: c4nr02096k1.pdf [file c4nr02096k1.pdf]

***In situ* assembly of well-dispersed Ni nanoparticles on silica nanotubes and excellent catalytic activity in 4-nitrophenol reduction**

Shenghuan Zhang,<sup>a</sup> Shili Gai,<sup>a</sup> Fei He,<sup>a</sup> Shujiang Ding<sup>\*b</sup>, Lei Li<sup>a</sup> and Piaoping Yang<sup>\*a</sup>

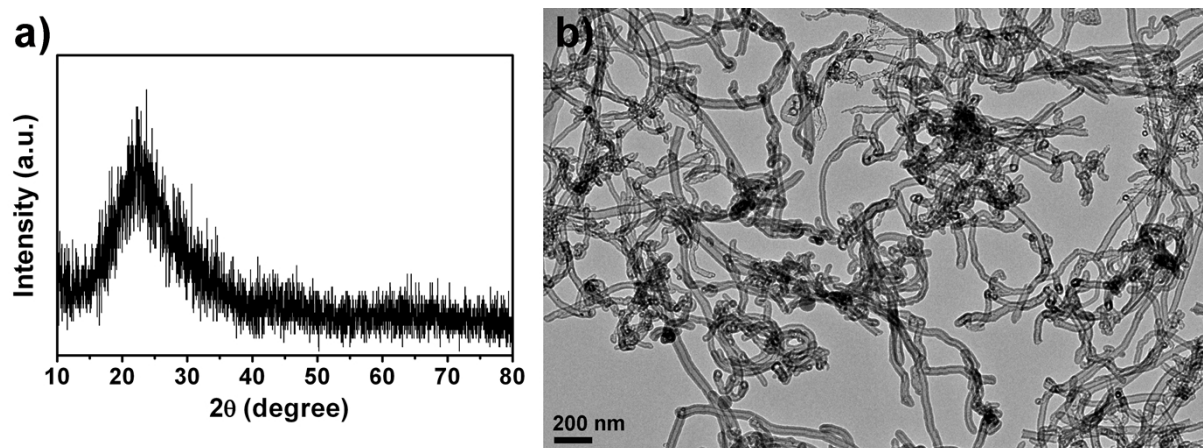

**Fig. S1** XRD pattern and TEM image of SNTs after calcination at 800 °C for 8 h.

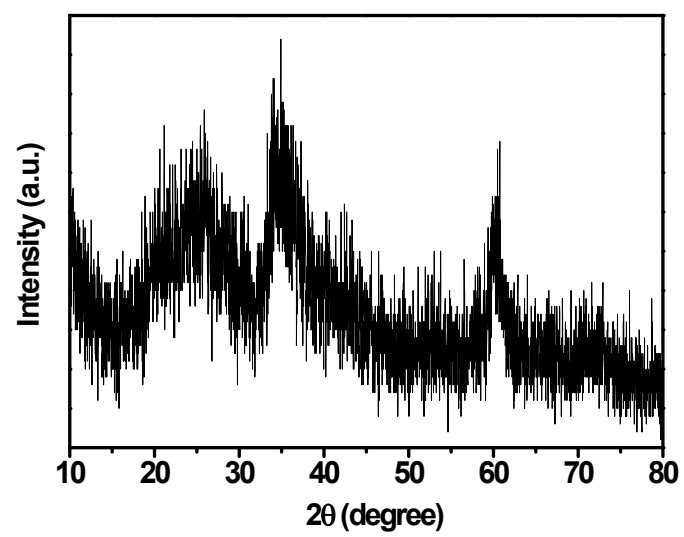

**Fig. S2** XRD pattern of NiSNTs.

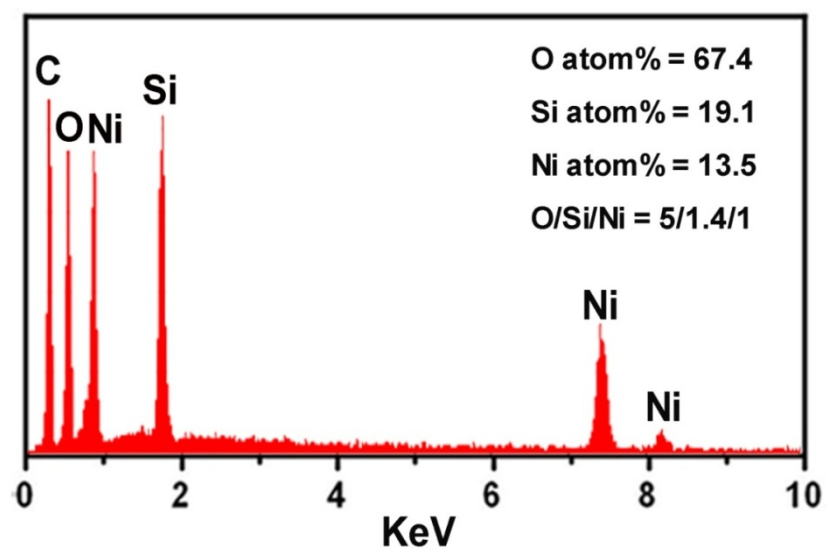

**Fig. S3** EDS spectrum of NiSNTs.

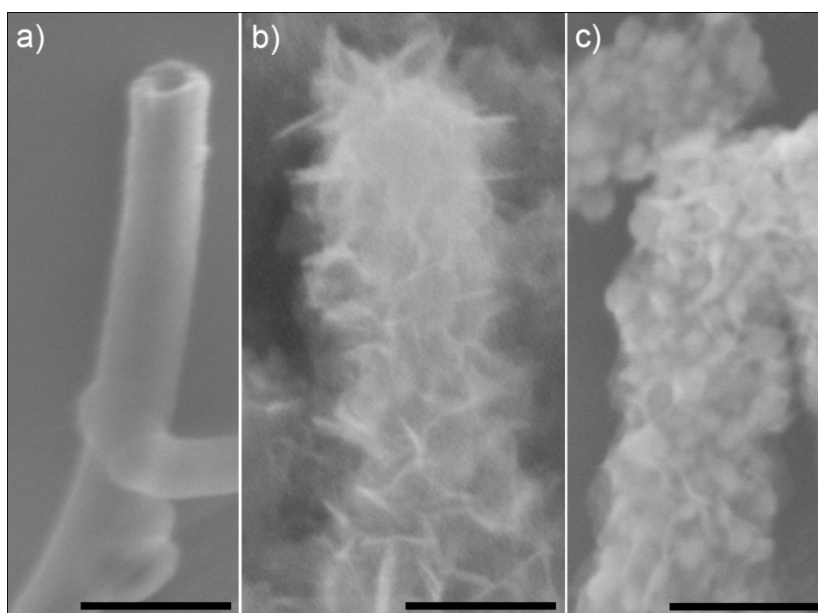

**Fig. S4** SEM images of a single SNT (a), NiSNTs (b) and Ni/SNTs (c). The scale bar is 100 nm.

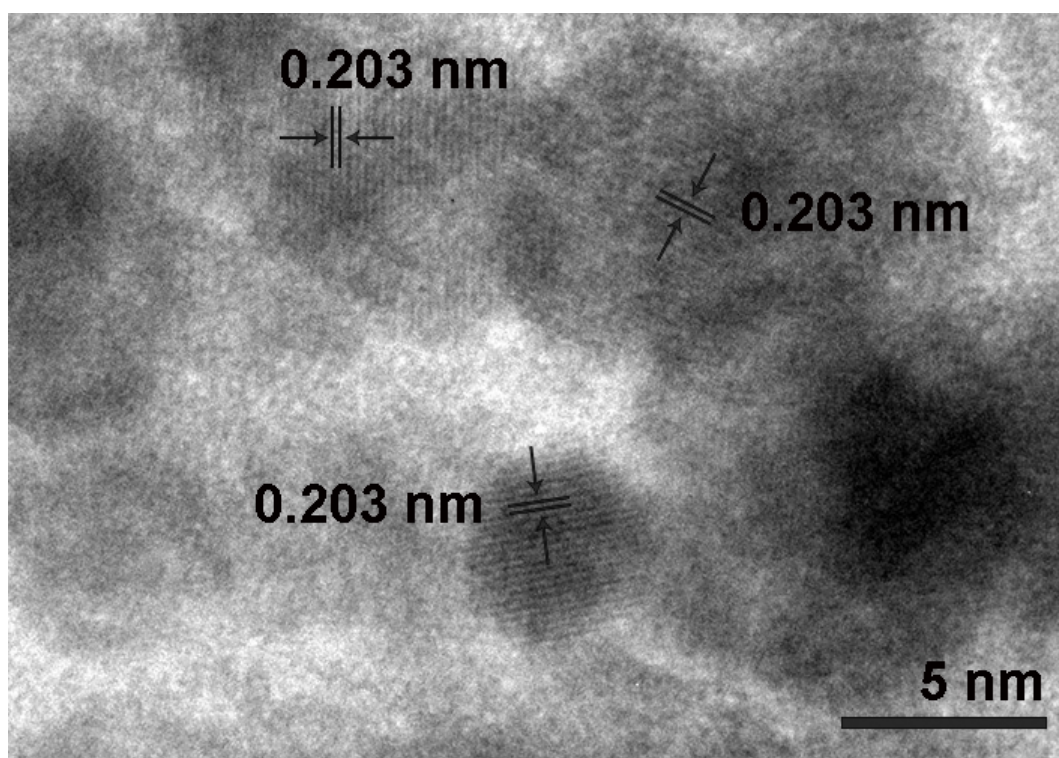

**Fig. S5** Enlarged HRTEM of Ni/SNTs.

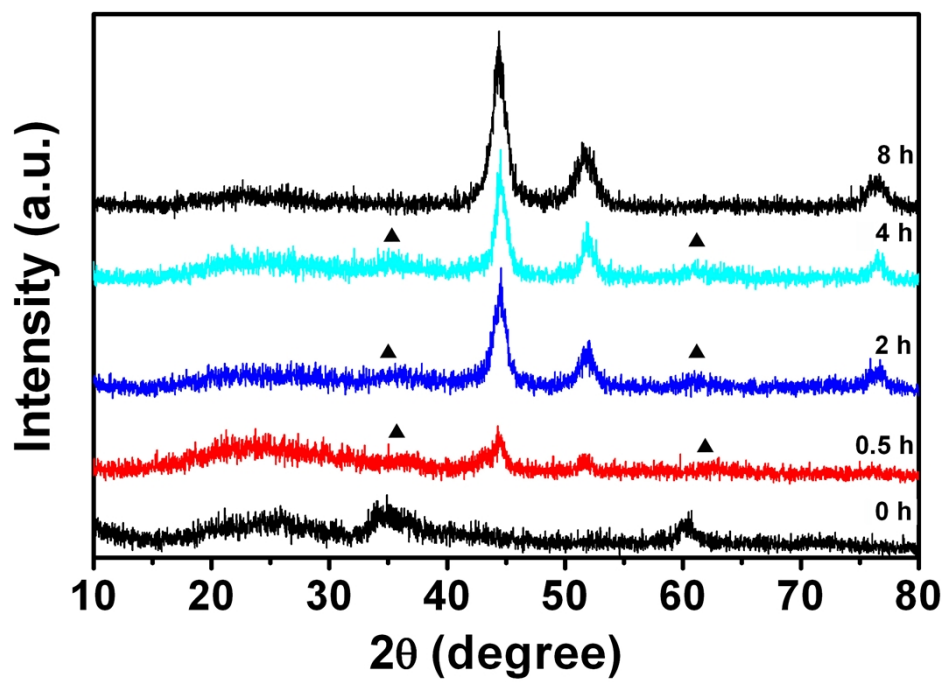

**Fig. S6** XRD patterns of Ni/SNTs synthesized at 800 °C for different reaction time.

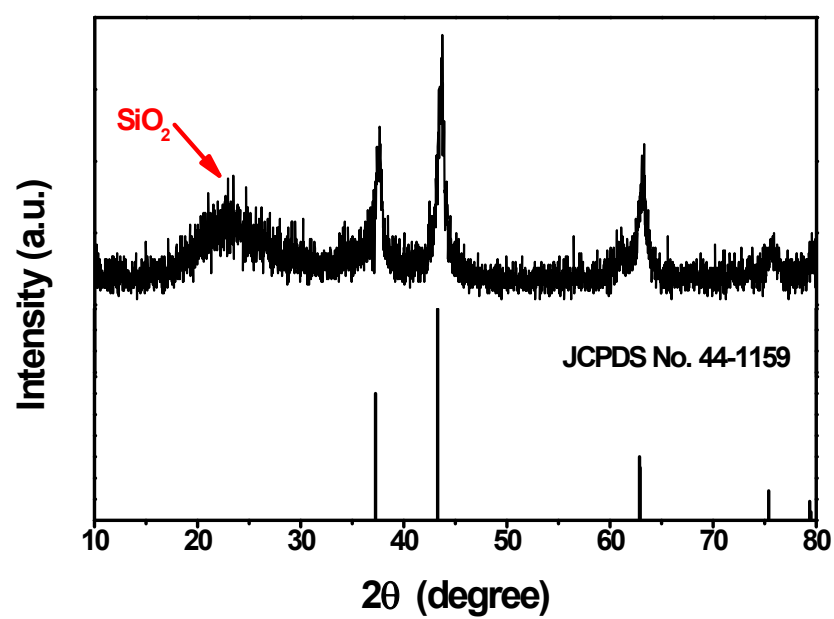

**Fig. S7** XRD pattern of NiO/SNTs and the standard data of rhombohedral phased NiO.



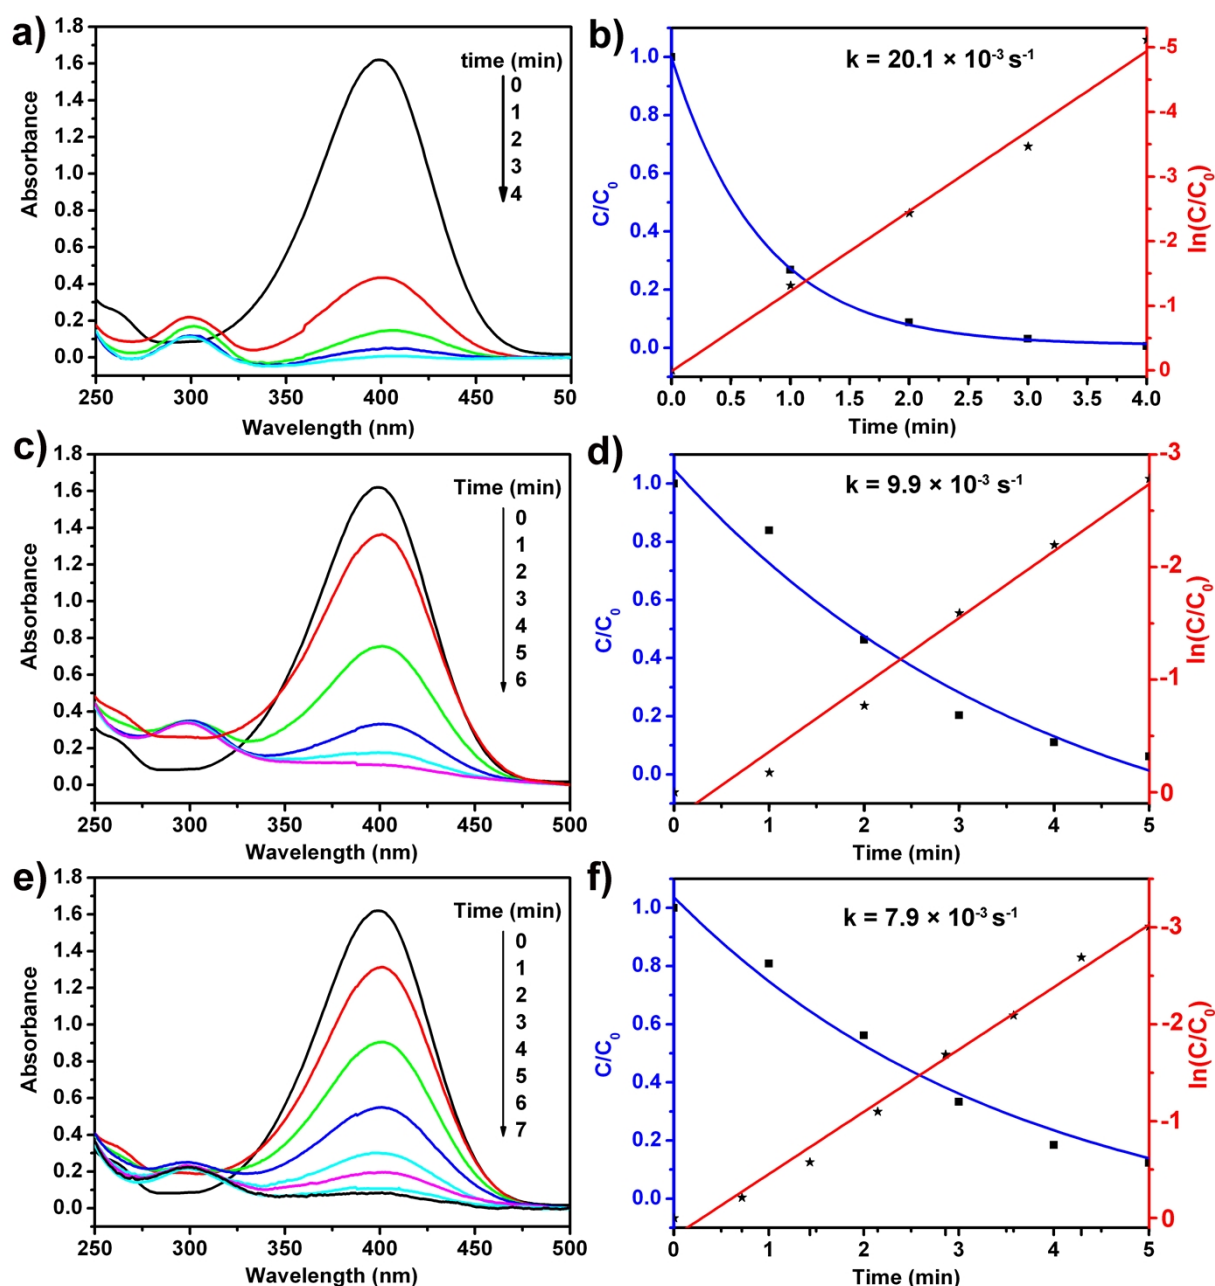

**Fig. S8** UV-vis spectra of the catalytic reduction of 4-NP to 4-AP developed at different reaction times over Ni/SNTs catalysts synthesized by adding 0.5 mmol (a), 0.25 mmol (c), 0.1 mmol (e).  $C/C_0$  and  $\ln(C/C_0)$  versus time for the reduction of 4-NP over Ni/SNTs catalysts synthesized by adding 0.5 mmol (b), 0.25 mmol (d), 0.1 mmol (f), the ratio of 4-NP concentration ( $C_t$  at time  $t$ ) to its initial value  $C_0$  is directly represented by the relative intensity of the respective absorption peak at 400 nm.

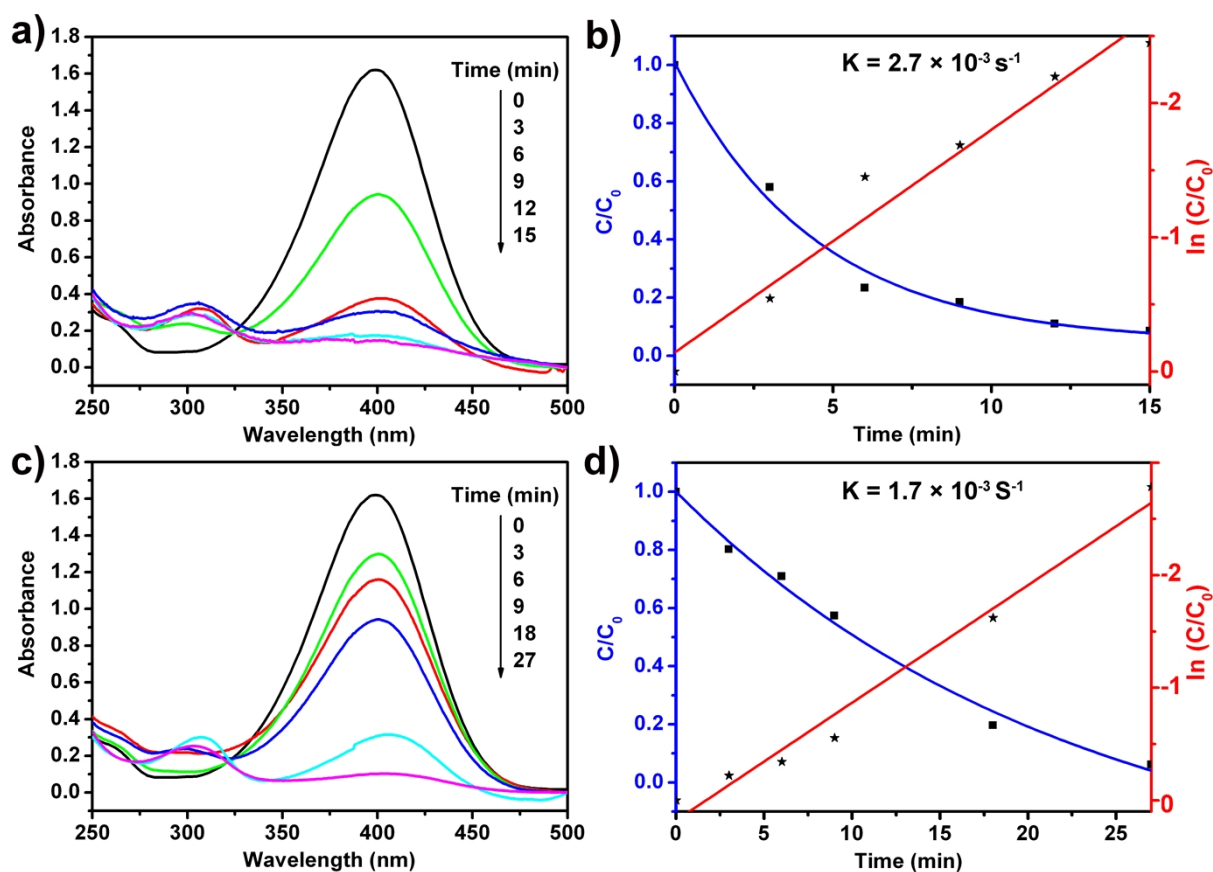

**Fig. S9** UV-vis spectra of the catalytic reduction of 4-NP to 4-AP developed at different reaction times over Ni/SNTs catalysts synthesized by wet impregnation (a) and Ni/CNTs (c);  $C/C_0$  and  $\ln(C/C_0)$  versus time for the reduction of 4-NP over Ni/SNTs catalysts synthesized by wet impregnation (b) and Ni/CNTs (d), the ratio of 4-NP concentration ( $C_t$  at time  $t$ ) to its initial value  $C_0$  is directly represented by the relative intensity of the respective absorption peak at 400 nm.

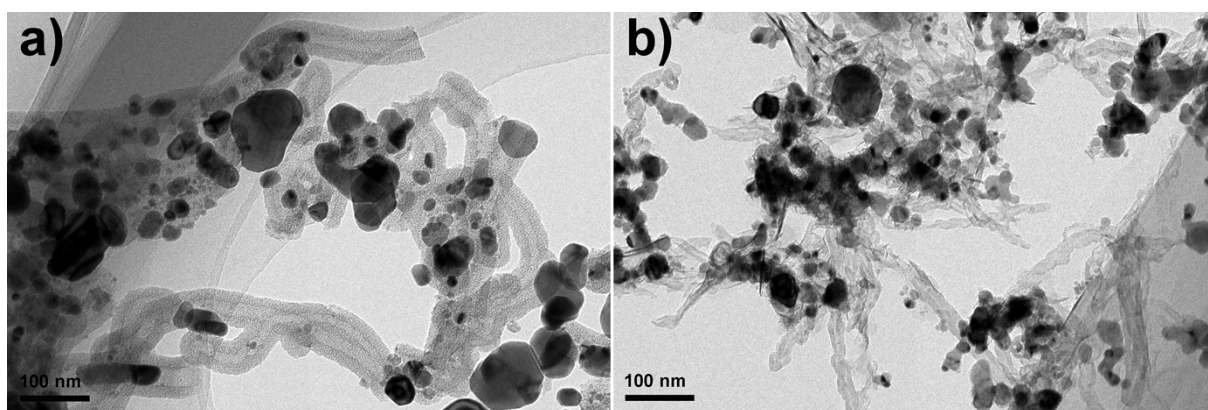

**Fig. S10** TEM images of Ni/SNTs synthesized by the wet impregnation method (a) and Ni/CNTs (b).

**Table S1** ICP data of Ni/SNTs synthesized by adding 0.1 mmol, 0.25 mmol, 0.5 mmol, 0.75 mmol NiCl<sub>2</sub> and Ni/SNTs synthesized by wet impregnation method and Ni/CNTs

| Samples              | Ni/SNTs    | Ni/SNTs     | Ni/SNTs    | Ni/SNTs     | Ni/SNTs            | Ni/CNTs |
|----------------------|------------|-------------|------------|-------------|--------------------|---------|
| (NiCl <sub>2</sub> ) | (0.1 mmol) | (0.25 mmol) | (0.5 mmol) | (0.75 mmol) | (wet impregnation) |         |
| Ni (Wt. %)           | 5.6        | 8.1         | 15.2       | 23.0        | 26.2               | 25.3    |

**Table S2** BET surface area, average pore diameter and total volume of Ni/SNTs synthesized by adding 0.1 mmol, 0.25 mmol, 0.5 mmol, 0.75 mmol NiCl<sub>2</sub> and Ni/SNTs synthesized by wet impregnation method

| Samples (NiCl <sub>2</sub> ) | $S_{\text{BET}}$<br>(m <sup>2</sup> /g) | $D$<br>(nm) | $V_{\text{p}}$<br>(cm <sup>3</sup> /g) |
|------------------------------|-----------------------------------------|-------------|----------------------------------------|
| Ni/SNTs (0.1 mmol)           | 123                                     | 11.2        | 0.34                                   |
| Ni/SNTs (0.25 mmol)          | 193                                     | 14.7        | 0.66                                   |
| Ni/SNTs (0.5 mmol)           | 201                                     | 19.6        | 0.86                                   |
| Ni/SNTs (0.75 mmol)          | 416                                     | 9.42        | 0.89                                   |
| Ni/SNTs (wet impregnation)   | 142                                     | 6.7         | 0.18                                   |

\* $S_{\text{BET}}$ , the BET specific surface area calculated in the relative pressures range from 0.05 to 0.2;  $D$ , the average diameter of mesopores calculated by the BJH method;  $V_{\text{p}}$ , the total pore volume calculated at the relative pressure of about 0.95.
